# Supplementary material for: Amyloid-β oligomers suppress subunit-specific glutamate receptor increase during LTP
Source: PubMed Central journal article supplement — Alzheimers Dement (N Y). 2019 Nov 20;5:797–808. doi: 10.1016/j.trci.2019.10.003 (PMC6880111; doi:10.1016/j.trci.2019.10.003), 2019-11-20
Supplement: mmc1.pdf [file mmc1.pdf]

| Figure | Analyzed item                | Condition                | Location | Timing | Mean $\pm$ SEM  | <i>P value</i> | N          | Test                        |                             |
|--------|------------------------------|--------------------------|----------|--------|-----------------|----------------|------------|-----------------------------|-----------------------------|
| 1C     | Spine density                | Vehicle                  | Dendrite | 1 day  | 0.68 $\pm$ 0.06 | .35            | 7          | Two-tailed Student's t test |                             |
|        |                              | A $\beta$ O <sub>s</sub> |          |        | 0.74 $\pm$ 0.04 |                | 7          |                             |                             |
|        |                              | Vehicle                  |          | 8 days | 0.79 $\pm$ 0.07 |                | .020*      |                             | 8                           |
|        |                              | A $\beta$ O <sub>s</sub> |          |        | 0.54 $\pm$ 0.06 |                |            |                             | 7                           |
|        | PSD95 fluorescence intensity | Vehicle                  | Dendrite | 1 day  | 100 $\pm$ 13    | .32            |            | 7                           | Two-tailed Student's t test |
|        |                              | A $\beta$ O <sub>s</sub> |          |        | 85 $\pm$ 5.2    |                |            | 7                           |                             |
|        |                              | Vehicle                  |          | 8 days | 100 $\pm$ 5.5   |                | 9.0E-05*** | 8                           |                             |
|        |                              | A $\beta$ O <sub>s</sub> |          |        | 64 $\pm$ 6.3    |                |            | 7                           |                             |
|        | PSD95 cluster density        | Vehicle                  | Dendrite | 1 day  | 0.60 $\pm$ 0.10 | .62            |            | 7                           | Two-tailed Student's t test |
|        |                              | A $\beta$ O <sub>s</sub> |          |        | 0.53 $\pm$ 0.06 |                |            | 7                           |                             |
|        |                              | Vehicle                  |          | 8 days | 0.55 $\pm$ 0.06 |                | .013*      | 8                           |                             |
|        |                              | A $\beta$ O <sub>s</sub> |          |        | 0.30 $\pm$ 0.06 |                |            | 7                           |                             |
