# Supplementary material for: Amyloid-β oligomers suppress subunit-specific glutamate receptor increase during LTP
Source: PubMed Central journal article supplement — Alzheimers Dement (N Y). 2019 Nov 20;5:797–808. doi: 10.1016/j.trci.2019.10.003 (PMC6880111; doi:10.1016/j.trci.2019.10.003), 2019-11-20
Supplement: mmc3.pdf [file mmc3.pdf]

| Figure | Analyzed item                    | Condition    | Location | Timing    | Mean $\pm$ SEM    | <i>P value</i> | N              | Test                   |    |
|--------|----------------------------------|--------------|----------|-----------|-------------------|----------------|----------------|------------------------|----|
| 2C     | GluA1-SEP fluorescence intensity | RevA $\beta$ | PSLM     | -3-0 min  | 101.18 $\pm$ 0.99 | <i>.17</i>     | 18             | Benjamin-Hochberg test |    |
|        |                                  | A $\beta$ Os |          |           | 99.58 $\pm$ 0.53  |                | 19             |                        |    |
|        |                                  | RevA $\beta$ |          | 3-6 min   | 114.90 $\pm$ 5.01 |                | <i>.0028**</i> |                        | 18 |
|        |                                  | A $\beta$ Os |          |           | 92.09 $\pm$ 5.01  |                |                |                        | 19 |
|        |                                  | RevA $\beta$ |          | 11-14 min | 110.15 $\pm$ 2.91 |                | <i>.026*</i>   |                        | 18 |
|        |                                  | A $\beta$ Os |          |           | 102.88 $\pm$ 4.22 |                |                |                        | 19 |
|        |                                  | RevA $\beta$ |          | 27-30 min | 113.63 $\pm$ 2.14 |                | <i>.025*</i>   |                        | 18 |
|        |                                  | A $\beta$ Os |          |           | 105.08 $\pm$ 2.93 |                |                |                        | 19 |
|        |                                  | RevA $\beta$ | Non-PSLM | -3-0 min  | 99.64 $\pm$ 0.67  | <i>.99</i>     | 18             | Benjamin-Hochberg test |    |
|        |                                  | A $\beta$ Os |          |           | 99.64 $\pm$ 0.31  |                | 19             |                        |    |
|        |                                  | RevA $\beta$ |          | 3-6 min   | 108.62 $\pm$ 3.43 |                | <i>.012*</i>   |                        | 18 |
|        |                                  | A $\beta$ Os |          |           | 92.64 $\pm$ 4.86  |                |                |                        | 19 |
|        |                                  | RevA $\beta$ |          | 11-14 min | 110.15 $\pm$ 2.91 |                | <i>.15</i>     |                        | 18 |
|        |                                  | A $\beta$ Os |          |           | 102.58 $\pm$ 4.29 |                |                |                        | 19 |
|        |                                  | RevA $\beta$ |          | 27-30 min | 108.63 $\pm$ 1.88 |                | <i>.20</i>     |                        | 18 |
|        |                                  | A $\beta$ Os |          |           | 104.24 $\pm$ 2.81 |                |                |                        | 19 |
