# Supplementary material for: Amyloid-β oligomers suppress subunit-specific glutamate receptor increase during LTP
Source: PubMed Central journal article supplement — Alzheimers Dement (N Y). 2019 Nov 20;5:797–808. doi: 10.1016/j.trci.2019.10.003 (PMC6880111; doi:10.1016/j.trci.2019.10.003), 2019-11-20
Supplement: mmc4.pdf [file mmc4.pdf]

| Figure | Analyzed item                    | Condition        | Location | Timing    | Mean $\pm$ SEM    | <i>P</i> value | N  | Test           |
|--------|----------------------------------|------------------|----------|-----------|-------------------|----------------|----|----------------|
| 3B     | GluA2-SEP fluorescence intensity | RevA $\beta$     | PSLM     | -3-0 min  | 98.32 $\pm$ 1.15  |                | 17 | Dunnett's test |
|        |                                  |                  |          | 3-6 min   | 102.87 $\pm$ 1.87 | .42            |    |                |
|        |                                  |                  |          | 11-14 min | 120.65 $\pm$ 3.37 | 1.5E-06***     |    |                |
|        |                                  |                  |          | 27-30 min | 112.96 $\pm$ 2.83 | .00024***      |    |                |
|        |                                  |                  | Non-PSLM | -3-0 min  | 98.61 $\pm$ 0.87  |                | 17 |                |
|        |                                  |                  |          | 3-6 min   | 101.75 $\pm$ 1.68 | .52            |    |                |
|        |                                  |                  |          | 11-14 min | 117.76 $\pm$ 2.56 | 1.4E-06***     |    |                |
|        |                                  |                  |          | 27-30 min | 112.58 $\pm$ 2.09 | 8.3E-06***     |    |                |
|        |                                  | A $\beta$ O $_s$ | PSLM     | -3-0 min  | 97.33 $\pm$ 1.77  |                | 19 | Dunnett's test |
|        |                                  |                  |          | 3-6 min   | 99.34 $\pm$ 2.13  | .93            |    |                |
|        |                                  |                  |          | 11-14 min | 113.90 $\pm$ 4.40 | .00054***      |    |                |
|        |                                  |                  |          | 27-30 min | 110.96 $\pm$ 2.88 | .0050**        |    |                |
|        |                                  |                  | Non-PSLM | -3-0 min  | 97.19 $\pm$ 1.43  |                | 19 |                |
|        |                                  |                  |          | 3-6 min   | 99.00 $\pm$ 2.03  | .95            |    |                |
|        |                                  |                  |          | 11-14 min | 115.59 $\pm$ 4.28 | .00017***      |    |                |
|        |                                  |                  |          | 27-30 min | 112.26 $\pm$ 3.53 | .0023**        |    |                |
