# Supplementary material for: Amyloid-β oligomers suppress subunit-specific glutamate receptor increase during LTP
Source: PubMed Central journal article supplement — Alzheimers Dement (N Y). 2019 Nov 20;5:797–808. doi: 10.1016/j.trci.2019.10.003 (PMC6880111; doi:10.1016/j.trci.2019.10.003), 2019-11-20
Supplement: mmc7.pdf [file mmc7.pdf]

| Figure | Analyzed item                  | Condition    | Location | Timing    | Mean $\pm$ SEM  | <i>P value</i> | N  | Test                   |
|--------|--------------------------------|--------------|----------|-----------|-----------------|----------------|----|------------------------|
| 4C     | GluA1-SEP exocytosis frequency | RevA $\beta$ | PSLM     | -3-0 min  | 0.78 $\pm$ 0.12 | .25            | 23 | Benjamin-Hochberg test |
|        |                                | A $\beta$ Os |          |           | 0.57 $\pm$ 0.14 |                | 23 |                        |
|        |                                | RevA $\beta$ |          | 0-3 min   | 1.54 $\pm$ 0.29 | .0033**        | 23 |                        |
|        |                                | A $\beta$ Os |          |           | 0.49 $\pm$ 0.16 |                | 23 |                        |
|        |                                | RevA $\beta$ |          | 6-9 min   | 0.53 $\pm$ 0.08 | .22            | 23 |                        |
|        |                                | A $\beta$ Os |          |           | 0.35 $\pm$ 0.12 |                | 23 |                        |
|        |                                | RevA $\beta$ |          | 27-30 min | 0.51 $\pm$ 0.10 | .00069****     | 23 |                        |
|        |                                | A $\beta$ Os |          |           | 0.10 $\pm$ 0.04 |                | 23 |                        |
|        |                                | RevA $\beta$ | Non-PSLM | -3-0 min  | 0.35 $\pm$ 0.04 | .0012**        | 23 | Benjamin-Hochberg test |
|        |                                | A $\beta$ Os |          |           | 0.18 $\pm$ 0.03 |                | 23 |                        |
|        |                                | RevA $\beta$ |          | 0-3 min   | 0.61 $\pm$ 0.14 | .0070**        | 23 |                        |
|        |                                | A $\beta$ Os |          |           | 0.19 $\pm$ 0.05 |                | 23 |                        |
|        |                                | RevA $\beta$ |          | 6-9 min   | 0.36 $\pm$ 0.05 | .00028****     | 23 |                        |
|        |                                | A $\beta$ Os |          |           | 0.13 $\pm$ 0.03 |                | 23 |                        |
|        |                                | RevA $\beta$ |          | 27-30 min | 0.22 $\pm$ 0.03 | .00024****     | 23 |                        |
|        |                                | A $\beta$ Os |          |           | 0.06 $\pm$ 0.01 |                | 23 |                        |
