# Supplementary material for: Amyloid-β oligomers suppress subunit-specific glutamate receptor increase during LTP
Source: PubMed Central journal article supplement — Alzheimers Dement (N Y). 2019 Nov 20;5:797–808. doi: 10.1016/j.trci.2019.10.003 (PMC6880111; doi:10.1016/j.trci.2019.10.003), 2019-11-20
Supplement: mmc8.pdf [file mmc8.pdf]

| Figure | Analyzed item                  | Condition             | Location | Timing    | Mean $\pm$ SEM  | <i>P value</i> | N  | Test           |    |                |
|--------|--------------------------------|-----------------------|----------|-----------|-----------------|----------------|----|----------------|----|----------------|
| 5C     | GluA2-SEP exocytosis frequency | RevA $\beta$          | PSLM     | -3-0 min  | 0.56 $\pm$ 0.12 |                | 24 | Dunnett's test |    |                |
|        |                                |                       |          | 0-3 min   | 0.56 $\pm$ 0.11 | <i>1</i>       |    |                |    |                |
|        |                                |                       |          | 6-9 min   | 0.72 $\pm$ 0.15 | <i>.66</i>     |    |                |    |                |
|        |                                |                       |          | 27-30 min | 0.38 $\pm$ 0.10 | <i>.60</i>     |    |                |    |                |
|        |                                |                       | Non-PSLM | -3-0 min  | 0.15 $\pm$ 0.02 |                |    |                | 23 | Dunnett's test |
|        |                                |                       |          | 0-3 min   | 0.16 $\pm$ 0.02 | <i>.97</i>     |    |                |    |                |
|        |                                |                       |          | 6-9 min   | 0.24 $\pm$ 0.03 | <i>.024*</i>   |    |                |    |                |
|        |                                |                       |          | 27-30 min | 0.15 $\pm$ 0.02 | <i>.99</i>     |    |                |    |                |
|        |                                | A $\beta$ O $\beta$ s | PSLM     | -3-0 min  | 0.58 $\pm$ 0.11 |                | 24 | Dunnett's test |    |                |
|        |                                |                       |          | 0-3 min   | 0.55 $\pm$ 0.15 | <i>.99</i>     |    |                |    |                |
|        |                                |                       |          | 6-9 min   | 0.61 $\pm$ 0.11 | <i>.99</i>     |    |                |    |                |
|        |                                |                       |          | 27-30 min | 0.36 $\pm$ 0.10 | <i>.46</i>     |    |                |    |                |
|        |                                |                       | Non-PSLM | -3-0 min  | 0.14 $\pm$ 0.01 |                | 23 | Dunnett's test |    |                |
|        |                                |                       |          | 0-3 min   | 0.17 $\pm$ 0.03 | <i>.75</i>     |    |                |    |                |
|        |                                |                       |          | 6-9 min   | 0.23 $\pm$ 0.03 | <i>.047*</i>   |    |                |    |                |
|        |                                |                       |          | 27-30 min | 0.12 $\pm$ 0.02 | <i>.82</i>     |    |                |    |                |
