# Supplementary material for: Amyloid-β oligomers suppress subunit-specific glutamate receptor increase during LTP
Source: PubMed Central journal article supplement — Alzheimers Dement (N Y). 2019 Nov 20;5:797–808. doi: 10.1016/j.trci.2019.10.003 (PMC6880111; doi:10.1016/j.trci.2019.10.003), 2019-11-20
Supplement: mmc9.pdf [file mmc9.pdf]

| Figure | Analyzed item                  | Condition    | Location | Timing    | Mean $\pm$ SEM  | <i>P</i> value | N  | Test                   |
|--------|--------------------------------|--------------|----------|-----------|-----------------|----------------|----|------------------------|
| 5C     | GluA2-SEP exocytosis frequency | RevA $\beta$ | PSLM     | -3-0 min  | 0.56 $\pm$ 0.12 | .93            | 24 | Benjamin-Hochberg test |
|        |                                | A $\beta$ Os |          |           | 0.58 $\pm$ 0.11 |                | 23 |                        |
|        |                                | RevA $\beta$ |          | 0-3 min   | 0.56 $\pm$ 0.11 | .94            | 24 |                        |
|        |                                | A $\beta$ Os |          |           | 0.55 $\pm$ 0.15 |                | 23 |                        |
|        |                                | RevA $\beta$ |          | 6-9 min   | 0.72 $\pm$ 0.15 | .54            | 24 |                        |
|        |                                | A $\beta$ Os |          |           | 0.61 $\pm$ 0.11 |                | 23 |                        |
|        |                                | RevA $\beta$ |          | 27-30 min | 0.38 $\pm$ 0.10 | .90            | 24 |                        |
|        |                                | A $\beta$ Os |          |           | 0.36 $\pm$ 0.10 |                | 23 |                        |
|        |                                | RevA $\beta$ | Non-PSLM | -3-0 min  | 0.15 $\pm$ 0.02 | .93            | 24 | Benjamin-Hochberg test |
|        |                                | A $\beta$ Os |          |           | 0.14 $\pm$ 0.01 |                | 23 |                        |
|        |                                | RevA $\beta$ |          | 0-3 min   | 0.16 $\pm$ 0.02 | .73            | 24 |                        |
|        |                                | A $\beta$ Os |          |           | 0.17 $\pm$ 0.03 |                | 23 |                        |
|        |                                | RevA $\beta$ |          | 6-9 min   | 0.24 $\pm$ 0.03 | .70            | 24 |                        |
|        |                                | A $\beta$ Os |          |           | 0.23 $\pm$ 0.03 |                | 23 |                        |
|        |                                | RevA $\beta$ |          | 27-30 min | 0.15 $\pm$ 0.02 | .27            | 24 |                        |
|        |                                | A $\beta$ Os |          |           | 0.12 $\pm$ 0.02 |                | 23 |                        |
